# Supplementary material
Source: Research Square preprint supplement (doi:10.21203/rs.3.rs-9839366/v1)
Supplement: Supplementary file 2 [file 886701d56036b1d5ff40b20e.docx]

**Supplementary Table 1.** Full survey results by setting.

| **Questions** | **Overall**  **(n=58)** | **RFR-IC**  **(n=29)** | **Community Hospitals**  **(n=14)** | **Subacute units**  **(n=15)** | **p-value** |
| --- | --- | --- | --- | --- | --- |
| What is your professional role? | | | | | ns |
| Staff physician | 45 (77.6%) | 29 (65.5%) | 13 (92.9%) | 13 (86.7%) |  |
| Nurse | 6 (10.3%) | 6 (20.7%) | 0 (0%) | 0 (0%) |  |
| Resident physician | 7 (12.1%) | 4 (13.8%) | 1 (7.1%) | 2 (13.3%) |  |
| How many beds are available in your ward/unit? | | | | | ns |
| < 50 beds | 49 (84.5%) | 24 (82.8%) | 13 (92.9%) | 12 (80.0%) |  |
| 50-100 beds | 7 (12.1%) | 4 (13.8%) | 1 (7.1%) | 2 (13.3%) |  |
| 100-150 beds | 2 (3.4%) | 1 (3.4%) | 0 (0%) | 1 (6.7%) |  |
| Facility location/affiliation?* | | | | | |
| Within a hospital | 23 (39.7%) | 7 (24.1%) | 6 (42.9%) | 10 (66.7%) | 0.023 |
| Out-of-hospital | 22 (37.9%) | 13 (44.8%) | 6 (42.9%) | 3 (20.0%) | ns |
| Healthcare facility | 2 (3.4%) | 0 (0%) | 0 (0%) | 2 (13.3%) | ns |
| Socio-healthcare facility | 16 (27.6%) | 11 (37.9%) | 5 (35.7%) | 0 (0%) | 0.011 |
| University hospital | 3 (5.2%) | 1 (3.4%) | 0 (0%) | 2 (13.3%) | ns |
| Affiliated with a university | 5 (8.6%) | 3 (10.3%) | 0 (0%) | 2 (13.3%) | ns |
| Facility type? | | | | | ns |
| Public | 39 (67.2%) | 17 (58.6%) | 11 (78.6%) | 11 (73.3%) |  |
| Accredited/private-contracted | 17 (29.3%) | 10 (34.5%) | 3 (21.4%) | 4 (26.7%) |  |
| Private | 2 (3.4%) | 2 (6.9%) | 0 (0%) | 0 (0%) |  |
| Admission pathways to the ward/unit?* | | | | | |
| From home | 38 (65.5%) | 23 (79.3%) | 11 (78.6%) | 4 (26.7%) | 0.002 |
| From the Emergency Department | 39 (67.2%) | 20 (69.0%) | 11 (78.6%) | 8 (53.3%) | ns |
| From acute hospital wards | 55 (94.8%) | 28 (96.6%) | 14 (100%) | 13 (86.7%) | ns |
| From rehabilitation facilities | 27 (46.6%) | 17 (58.6%) | 6 (42.9%) | 4 (26.7%) | ns |
| From nursing homes | 15 (25.9%) | 12 (41.4%) | 1 (7.1%) | 2 (13.3%) | 0.035 |
| Are clinical stability criteria used for admission to the ward/unit?* | | | | | |
| Clinical assessment without specific tools | 34 (58.6%) | 18 (62.1%) | 7 (50.0%) | 9 (60.0%) | ns |
| National Early Warning Score (NEWS) | 22 (37.9%) | 9 (31.0%) | 9 (64.3%) | 4 (26.7%) | ns |
| Care Continuity Index (ICA) | 10 (17.2%) | 3 (10.3%) | 3 (21.4%) | 4 (26.7%) | ns |
| What are the care goals in your ward/unit?* | | | | | |
| Rehabilitation/reactivation | 35 (60.3%) | 23 (79.3%) | 4 (28.6%) | 8 (53.3%) | 0.005 |
| Clinical stabilization | 47 (81.0%) | 21 (72.4%) | 13 (92.9%) | 13 (86.7%) | ns |
| Palliative care | 16 (27.6%) | 8 (27.6%) | 6 (42.9%) | 2 (13.3%) | ns |
| Stabilization of social care needs | 38 (65.5%) | 16 (55.2%) | 13 (92.9%) | 9 (60.0%) | 0.042 |
| Management of neuropsychiatric/behavioral disturbances | 19 (32.8%) | 13 (44.8%) | 3 (21.4%) | 3 (20.0%) | ns |
| What is the average length of stay in your ward/unit? | | | | | 0.007 |
| < 30 days | 31 (53.4%) | 9 (31.0%) | 11 (78.6%) | 11 (73.3%) |  |
| 30-60 days | 20 (34.5%) | 13 (44.8%) | 3 (21.4%) | 4 (26.7%) |  |
| > 60 days | 7 (12.1%) | 7.0 (24.1%) | 0.0 (0.0%) | 0 (0%) |  |
| Which professionals are generally involved in the daily care provided in your setting?* | | | | | |
| Physician | 57 (98.3%) | 28 (96.6%) | 14 (100%) | 15 (100%) | ns |
| Nurse | 58 (100%) | 29 (100%) | 14 (100%) | 15 (100%) | - |
| Healthcare assistant | 53 (91.4%) | 27 (93.1%) | 12 (85.7%) | 14 (93.3%) | ns |
| Physiotherapist | 50 (86.2%) | 25 (86.2%) | 10 (71.4%) | 15 (100%) | ns |
| Social worker | 37 (63.8%) | 20 (69.0%) | 7 (50.0%) | 10 (66.7%) | ns |
| Speech therapist | 23 (39.7%) | 15 (51.7%) | 2 (14.3%) | 6 (40.0%) | ns |
| Occupational therapist | 15 (25.9%) | 12 (41.4%) | 1 (7.1%) | 2 (13.3%) | 0.035 |
| Psychologist | 15 (25.9%) | 12 (41.4%) | 1 (7.1%) | 2 (13.3%) | 0.035 |
| Nutritionist | 14 (24.1%) | 8 (27.6%) | 1 (7.1%) | 5 (33.3%) | ns |
| Pharmacist | 6 (10.3%) | 4 (13.8%) | 0 (0%) | 2 (13.3%) | ns |
| What specialties do the physicians working in your unit have?* | | | | | |
| Geriatrics | 48 (82.8%) | 23 (79.3%) | 10 (71.4%) | 15 (100%) | ns |
| Internal medicine | 19 (32.8%) | 5 (17.2%) | 5 (35.7%) | 9 (60.0%) | 0.015 |
| General practice | 8 (13.8%) | 6 (20.7%) | 2 (14.3%) | 0 (0%) | ns |
| Pulmonology | 3 (5.2%) | 1 (3.4%) | 1 (7.1%) | 1 (6.7%) | ns |
| Neurology | 3 (5.2%) | 2 (6.9%) | 0 (0%) | 1 (6.7%) | ns |
| Cardiology | 2 (3.4%) | 0 (0%) | 0 (0%) | 2 (13.3%) | 0.026 |
| Infectious diseases | 2 (3.4%) | 0 (0%) | 1 (7.1%) | 1 (6.7%) | ns |
| No specialty | 6 (10.3%) | 3 (10.3%) | 3 (21.4%) | 0 (0%) | ns |
| How often is a physician present? | | | | | ns |
| 20 hours/week | 11 (19.0%) | 6 (20.7%) | 5 (35.7%) | 0 (0%) |  |
| 38 hours/week | 40 (69.0%) | 19 (65.5%) | 7 (50.0%) | 14 (93.3%) |  |
| Other | 7 (12.1%) | 4 (13.8%) | 2 (14.3%) | 1 (6.7%) |  |
| How often is a speech therapist present? | | | | | 0.047 |
| Monday to Friday | 11 (19.6%) | 5 (17.2%) | 2 (15.4%) | 4 (28.6%) |  |
| On request | 28 (50.0%) | 16 (55.2%) | 3 (23.1%) | 9 (64.3%) |  |
| On request, with out-of-pocket payment | 1 (1.8%) | 1 (3.4%) | 0 (0%) | 0 (0%) |  |
| Not available | 16 (28.6%) | 7 (24.1%) | 8 (61.5%) | 1 (7.1%) |  |
| How often is a physiotherapist present? | | | | | ns |
| Monday to Saturday | 9 (15.5%) | 6 (20.7%) | 0 (0%) | 3 (20.0%) |  |
| Monday to Friday | 36 (62.1%) | 18 (62.1%) | 7 (50.0%) | 11 (73.3%) |  |
| On request | 8 (13.8%) | 3 (10.3%) | 4 (28.6%) | 1 (6.7%) |  |
| Not available | 5 (8.6%) | 2 (6.9%) | 3 (21.4%) | 0 (0%) |  |
| How often is an occupational therapist present? | | | | | ns |
| Monday to Saturday | 1 (1.8%) | 1 (3.7%) | 0 (0%) | 0 (0%) |  |
| Monday to Friday | 9 (16.1%) | 8 (29.6%) | 0 (0%) | 1 (6.7%) |  |
| On request | 8 (14.3%) | 3 (11.1%) | 2 (14.3%) | 3 (20.0%) |  |
| Not available | 38 (67.9%) | 15 (55.6%) | 12 (85.7%) | 11 (73.3%) |  |
| Is there a dedicated space for occupational therapy? | | | | | 0.043 |
| Yes | 20 (38.5%) | 13 (52.0%) | 3 (25.0%) | 4 (26.7%) |  |
| Is an internal basic radiology service available? | | | | | 0.013 |
| Daily | 25 (43.1%) | 7 (24.1%) | 5 (35.7%) | 13 (86.7%) |  |
| Monday to Friday | 3 (5.2%) | 2 (6.9%) | 1 (7.1%) | 0 (0%) |  |
| Twice a week | 5 (8.6%) | 3 (10.3%) | 2 (14.3%) | 0 (0%) |  |
| Once a week | 5 (8.6%) | 4 (13.8%) | 1 (7.1%) | 0 (0%) |  |
| On request | 2 (3.4%) | 1 (3.4%) | 0 (0%) | 1 (6.7%) |  |
| Not available | 18 (31.0%) | 12 (41.4%) | 5 (35.7%) | 1 (6.7%) |  |
| Is an internal basic ultrasound service available? | | | | | ns |
| Daily | 22 (37.9%) | 8 (27.6%) | 4 (28.6%) | 10 (66.7%) |  |
| Monday to Friday | 3 (5.2%) | 2 (6.9%) | 1 (7.1%) | 0 (0%) |  |
| Twice a week | 5 (8.6%) | 2 (6.9%) | 1 (7.1%) | 2 (13.3%) |  |
| Once a week | 6 (10.3%) | 5 (17.2%) | 1 (7.1%) | 0 (0%) |  |
| On request | 5 (8.6%) | 3 (10.3%) | 1 (7.1%) | 1 (6.7%) |  |
| POCUS | 4 (6.9%) | 1 (3.4%) | 2 (14.3%) | 1 (6.7%) |  |
| Not available | 13 (22.4%) | 8 (27.6%) | 4 (28.6%) | 1 (6.7%) |  |
| Is an internal advanced imaging service (CT/MRI) available? | | | | | 0.003 |
| Daily | 19 (32.8%) | 5 (17.2%) | 3 (21.4%) | 11 (73.3%) |  |
| Monday to Friday | 3 (5.2%) | 2 (6.9%) | 1 (7.1%) | 0 (0%) |  |
| Twice a week | 1 (1.7%) | 1 (3.4%) | 0 (0%) | 0 (0%) |  |
| Once a week | 1 (1.7%) | 0 (0%) | 1 (7.1%) | 0 (0%) |  |
| On request | 2 (3.4%) | 1 (3.4%) | 0 (0%) | 1 (6.7%) |  |
| Not available | 32 (55.2%) | 20 (69.0%) | 9 (64.3%) | 3 (20.0%) |  |
| Is an internal laboratory testing service available? | | | | | 0.004 |
| Daily | 26 (44.8%) | 8 (27.6%) | 5 (35.7%) | 13 (86.7%) |  |
| Monday to Saturday | 2 (3.4%) | 2 (6.9%) | 0 (0%) | 0 (0%) |  |
| Monday to Friday | 18 (31.0%) | 11 (37.9%) | 7 (50.0%) | 0 (0%) |  |
| On some days of the week | 2 (3.4%) | 2 (6.9%) | 0 (0%) | 0 (0%) |  |
| Not available | 10 (17.2%) | 6 (20.7%) | 2 (14.3%) | 2 (13.3%) |  |
| Is teaching activity for undergraduate or postgraduate courses carried out in your facility? |  |  |  |  | ns |
| Yes | 26 (44.8%) | 13 (44.8%) | 4 (28.6%) | 9 (60.0%) |  |
| If yes, for which professional groups?* (1) | | | | |  |
| Physicians | 20 (76.9%) | 9 (69.2%) | 3 (75.0%) | 8 (88.9%) | ns |
| Nurses | 20 (76.9%) | 9 (69.2%) | 3 (75.0%) | 8 (88.9%) | ns |
| Occupational therapists | 6 (23.1%) | 2 (15.4%) | 1 (25.0%) | 3 (33.3%) | ns |
| Speech therapists | 5 (19.2%) | 1 (7.7%) | 0 (0%) | 4 (44.4%) | ns |

* Multiple responses were allowed.

(1) Among the 31 respondents (15, 5, and 11 in the three settings, respectively) who answered “Yes” to the previous question.

CT: computed tomography; MRI: magnetic resonance imaging; ns: not significant; POCUS: point-of-care ultrasound.
