# Supplementary material
Source: Research Square preprint supplement (doi:10.21203/rs.3.rs-9839366/v1)

**Supplementary Figure 1.** Regional distribution of respondents.


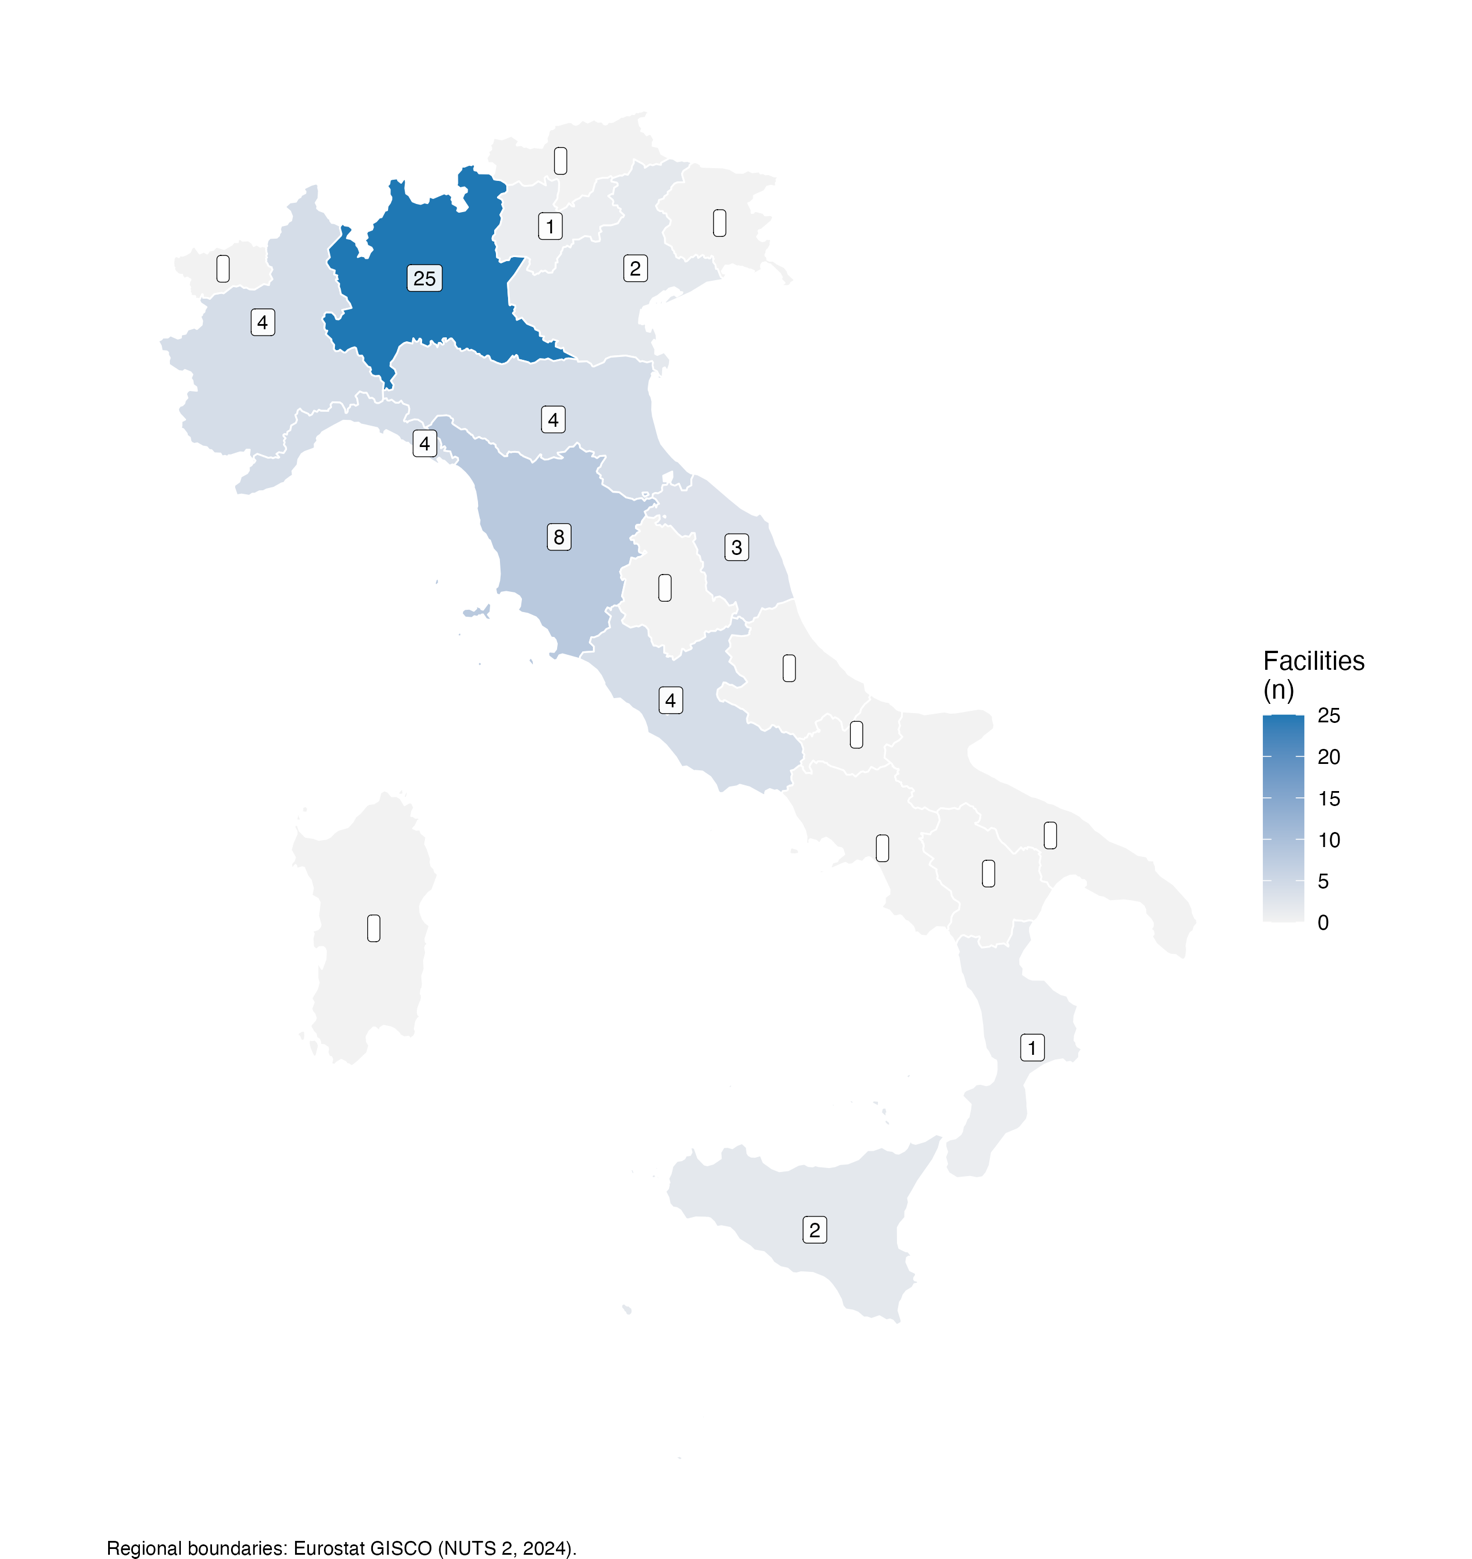

Supplement: Supplementary file 1 [file 31f4a15976fa1b5cf22e30f5.docx]
